# Supplementary material
Source: PubMed Central journal article supplement (PMC7714535)
Supplement: rg200104suppa1.pdf [file rg200104suppa1.pdf]

**Table E1: Abbreviated MRI Strategies for Hepatocellular Carcinoma Surveillance: Literature and Proposed Strategies, and Summary of Diagnostic Performance**

| Study, Journal, and Reference No.                        | Country and Year | Technique and Sequences                                                      | Time (min) | Study Details                                                                         | Reference Standard                                                              | Sensitivity (%)*         | Specificity (%)* | Inter-Reader Agreement (k)* |
|----------------------------------------------------------|------------------|------------------------------------------------------------------------------|------------|---------------------------------------------------------------------------------------|---------------------------------------------------------------------------------|--------------------------|------------------|-----------------------------|
| <b>DCE abbreviated MRI</b>                               |                  |                                                                              |            |                                                                                       |                                                                                 |                          |                  |                             |
| Vietti Violi et al, European Radiology (47)              | USA, 2020        | HBP DCE (sim): T2-weighted and T1-weighted DCE (gadoxetic acid)              | 17         | >15 lesions in 13 of 237 patients                                                     | All available patient data                                                      | 85                       | 100              | 0.86                        |
| Khatri et al, Journal of Magnetic Resonance Imaging (39) | USA, 2019        | DCE (sim): T2-weighted and T1-weighted DCE (extracellular contrast material) | 12         | 121 lesions in 86 patients, 28 of whom had HCC                                        | Histologic examination, imaging, and clinical follow-up at 6 months             | 92                       | 89               | 0.80, (0.63) <sup>†</sup>   |
| Lee et al, Abdominal Radiology (40)                      | USA, 2018        | DCE (sim): T1-weighted DCE (extracellular contrast material)                 | 10         | 27 lesions in 156 patients                                                            | LI-RADS 4 and 5 lesions at complete MRI                                         | ...                      | ...              | 0.305                       |
| <b>HPB abbreviated MRI</b>                               |                  |                                                                              |            |                                                                                       |                                                                                 |                          |                  |                             |
| Vietti Violi et al, European Radiology (47)              | USA, 2020        | HBP (sim): T2-weighted, HBP T1-weighted (gadoxetic acid), and DWI            | 14         | >15 lesions in 13 of 237 patients                                                     | All available patient data                                                      | 81                       | 95               | (0.75) <sup>†</sup>         |
| Brunsing et al, Radiology: Imaging Cancer (48)           | USA, 2020        | HBP (sim): T2-weighted, HBP T1-weighted (gadoxetic acid), and DWI            | 10         | HCC 12 of 141 patients with follow-up (57% lost to follow-up) from 330 total patients | Histopathologic examination, imaging, and clinical follow-up criteria at 1 year | 92                       | 91               | ...                         |
| Whang S et al, European Radiology (49)                   | Korea, 2020      | HBP (sim): T2-weighted, HBP T1-weighted                                      | 10         | 173 HCCs in 140 of 263 patients.                                                      | Imaging and clinical follow-up                                                  | 89–90, (84) <sup>†</sup> | 92.7             | 0.98                        |

|                                                 |             |                                                                                                                        |    |                                                         |                                                                                                                                                 |                         |                         |                             |
|-------------------------------------------------|-------------|------------------------------------------------------------------------------------------------------------------------|----|---------------------------------------------------------|-------------------------------------------------------------------------------------------------------------------------------------------------|-------------------------|-------------------------|-----------------------------|
|                                                 |             | (gadoteric acid), DWI, and nonenhanced abbreviated MRI                                                                 |    |                                                         |                                                                                                                                                 |                         |                         |                             |
| Tillman et al, Clinical Radiology (43)          | USA, 2018   | HBP (sim) T2-weighted and HBP T1-weighted (gadoteric acid)                                                             | 10 | 27 HCCs in 13 of 79 patients.                           | Imaging, presumptive treatment per multidisciplinary board consensus, histopathologic examination, resections, and/or explants within 13 months | Set 1: 83<br>Set 2: 84  | ...                     | 0.75 <sup>†</sup>           |
| Besa et al, Abdominal Radiology (38)            | USA, 2017   | HBP (sim): axial and coronal T2-weighted, in- and opposed-phase T1-weighted, HBP T1-weighted (gadoteric acid), and DWI | 10 | 80 HCCs in 62 of 174 patients (surveillance population) | Histopathologic examination or combination of clinical and imaging follow-up at 2 years                                                         | 81 (78) <sup>†</sup>    | 96                      | 0.79–0.88 <sup>†</sup>      |
| Marks et al, American Journal of Radiology (42) | USA, 2015   | HBP (sim):<br>Set 1: T2-weighted and HBP T1-weighted<br>Set 2: Set 1 and DWI (gadoteric acid)                          | 10 | 49 of 298 patients with HCC                             | Histopathologic evaluation, imaging, and clinical follow-up criteria at 13 months                                                               | Set 1: 83,<br>Set 2: 84 | Set 1: 93,<br>Set 2: 93 | Set 1: 0.72,<br>Set 2: 0.72 |
| Nonenhanced abbreviated MRI                     |             |                                                                                                                        |    |                                                         |                                                                                                                                                 |                         |                         |                             |
| Vietti Violi et al European Radiology (47)      | USA 2020    | Nonenhanced DCE (sim): T2-weighted and DWI                                                                             | 14 | >15 lesions in 13 of 237 patients.                      | All available patient data                                                                                                                      | 62                      | 96                      | 0.76                        |
| Park et al, Journal of Hepatology (50)          | Korea, 2020 | Nonenhanced (sim): T2-weighted, T1-weighted, and DWI                                                                   | 6  | 48 HCCs in 43 of 382 patients                           | Clinical, histopathologic examination, or dynamic CT at 6 months                                                                                | 79 (77) <sup>†</sup>    | 98                      | ...                         |

|                                                  |                 |                                                                                                |   |                                  |                                |                            |       |                                    |
|--------------------------------------------------|-----------------|------------------------------------------------------------------------------------------------|---|----------------------------------|--------------------------------|----------------------------|-------|------------------------------------|
| Whang S et al, European Radiology (49)           | Korea, 2020     | Nonenhanced (sim): T2-weighted, in- and opposed-phase T1-weighted, DWI and HBP abbreviated MRI | 8 | 173 HCCs in 140 of 263 patients  | Imaging and clinical follow-up | 86 (80–82) <sup>†</sup>    | 92.7  | 0.89                               |
| Chan et al, European Radiology Experimental (41) | Australia, 2019 | Nonenhanced (sim): T2-weighted, T1-weighted, and DWI                                           | 6 | 42 HCCs in 28 of 188 patients.   | Complete MRI                   | 85 (77) <sup>‡</sup>       | 93    | 0.51–0.57 (0.23–0.32) <sup>§</sup> |
| Han S et al, Korean Journal of Radiology (51)    | Korea, 2018     | Nonenhanced (sim): T2-weighted, T1-weighted, in- and opposed-phase T1-weighted, and DWI        | 6 | 237 HCCs in 175 of 247 patients. | Histopathologic examination    | 83–86 (71–76) <sup>†</sup> | 76–88 | 0.67                               |

Note.—Strategies can be broadly categorized into (a) nonenhanced imaging, (b) dynamic contrast enhanced imaging, and (c) HBP imaging with a hepatobiliary contrast agent. The per-lesion and per-patient sensitivity of abbreviated MRI far surpasses that of US, which is approximately 25%–60%. Per-patient sensitivity of abbreviated MRI was approximately 80%–90%, depending on the protocol. Sim = simulated, DCE = dynamic contrast-enhanced.

\* Unless otherwise indicated, data are per patient.

<sup>†</sup> Data in parentheses are per lesion.

<sup>‡</sup> Data in parentheses are per lesion for LI-RADS 4, 5, and M.

<sup>§</sup> Data in parentheses are per patient for LI-RADS 4,5, and M.
